# Supplementary material for: Grainyhead-like 2 regulates epithelial morphogenesis by establishing functional tight junctions through the organization of a molecular network among claudin3, claudin4, and Rab25
Source: PubMed Central journal article supplement — Mol Biol Cell. 2012 Aug 1;23(15):2845–55. doi: 10.1091/mbc.E12-02-0097 (PMC3408412; doi:10.1091/mbc.e12-02-0097), 2012-08-01
Supplement: supp_E12-02-0097_CombinedSupMats.pdf [file supp_E12-02-0097_CombinedSupMats.pdf]

**Supplementary Table 1. Differential expression of cholangiocyte markers in hepatoblasts and cholangiocytes**

|                                                 | P0 cholangiocytes<br>vs<br>E14.5 hepatoblasts |
|-------------------------------------------------|-----------------------------------------------|
| Cytokeratin 7                                   | 7.5                                           |
| Cytokeratin 19                                  | 13                                            |
| Osteopontin                                     | 44                                            |
| Pkhd1 (polycystic kidney and hepatic disease 1) | 6.5                                           |

Values represent fold changes.

**Supplementary Table 2. Genes upregulated in cholangiocytes**

| Gene name                                                                        | Abbreviation | Accession |
|----------------------------------------------------------------------------------|--------------|-----------|
| <b>Transcription factors</b>                                                     |              |           |
| B-box and SPRY domain containing                                                 | Bspry        | NM_138653 |
| grainyhead-like 2 (Drosophila)                                                   | Grhl2        | NM_026496 |
| POU domain, class 2, associating factor 1                                        | Pou2af1      | NM_011136 |
| hairly/enhancer-of-split related with YRPW motif 1                               | Hey1         | NM_010423 |
| SRY-box containing gene 9                                                        | Sox9         | NM_011448 |
| SRY-box containing gene 17                                                       | Sox17        | NM_011441 |
| Kruppel-like factor 4 (gut)                                                      | Klf4         | NM_010637 |
| Kruppel-like factor 9                                                            | Klf9         | NM_010638 |
| Scleraxis                                                                        | Scx          | NM_198885 |
| ets homologous factor                                                            | Ehf          | NM_007914 |
| <b>Growth factors and chemokines</b>                                             |              |           |
| connective tissue growth factor                                                  | Ctgf         | NM_010217 |
| chemokine (C-X3-C motif) ligand 1                                                | Cx3cl1       | NM_009142 |
| chemokine (C-X-C motif) ligand 4                                                 | Cxcl4        | NM_019932 |
| platelet-derived growth factor, C polypeptide                                    | Pdgfc        | NM_019971 |
| platelet-derived growth factor, D polypeptide                                    | Pdgfd        | BC030896  |
| <b>Proteases</b>                                                                 |              |           |
| angiotensin I converting enzyme (peptidyl-dipeptidase A) 2                       | Ace2         | NM_027286 |
| chitinase 3-like 3                                                               | Chi3l3       | NM_009892 |
| chitinase 3-like 4                                                               | Chi3l4       | NM_145126 |
| a disintegrin-like and metalloproteinase<br>with thrombospondin type 1 motif, 1  | Adamts1      | NM_009621 |
| a disintegrin-like and metalloproteinase<br>with thrombospondin type 1 motif, 16 | Adamts16     | NM_172053 |
| <b>Others</b>                                                                    |              |           |
| ankyrin repeat domain 1 (cardiac muscle)                                         | Ankrd1       | NM_013468 |
| suppression of tumorigenicity 14 (colon carcinoma)                               | St14         | NM_011176 |

**Supplementary Table 3. Differential expression of claudins in hepatoblasts and cholangiocytes**

|            | P0 cholangiocytes<br>vs<br>E14.5 hepatoblasts |
|------------|-----------------------------------------------|
| claudin 1  | 0.42                                          |
| claudin 2  | 7.6                                           |
| claudin 3  | 8.5                                           |
| claudin 4  | 7.9                                           |
| claudin 5  | 0.79                                          |
| claudin 6  | 10                                            |
| claudin 7  | 8.4                                           |
| claudin 8  | 5.9                                           |
| claudin 9  | 1.7                                           |
| claudin 10 | 2.7                                           |
| claudin 11 | 1.0                                           |
| claudin 12 | 0.98                                          |
| claudin 13 | 0.41                                          |
| claudin 14 | 0.62                                          |
| claudin 15 | 1.5                                           |
| claudin 16 | 0.94                                          |
| claudin 17 | 1.0                                           |
| claudin 18 | 1.6                                           |
| claudin 19 | 1.3                                           |
| claudin 22 | 0.97                                          |
| claudin 23 | 3.6                                           |

Values represent fold changes.

**Supplementary Table 4. Possible Grhl2 targets in cholangiocytes**

| Gene Name                 |       | Accession | P0 cholangiocytes<br>vs<br>E14.5 hepatoblasts |
|---------------------------|-------|-----------|-----------------------------------------------|
| secreted phosphoprotein 1 | Spp1  | NM_009263 | 44                                            |
| chromogranin B            | Chgb  | NM_007694 | 12                                            |
| PDGF-C                    | Pdgfc | NM_019971 | 11                                            |
| PDGF-D                    | Pdgfd | BC030896  | 10                                            |
| growth arrest specific 6  | Gas6  | NM_019521 | 8.7                                           |
| doublecortin              | Dcx   | NM_010025 | 8.7                                           |
| claudin 7                 | Cldn7 | NM_016887 | 8.4                                           |
| chromogranin A            | Chga  | NM_007693 | 6.7                                           |
| plakophilin 3             | Pkp3  | NM_019762 | 6.2                                           |
| RAB25                     | Rab25 | NM_016899 | 6.1                                           |

Grhl2 binding sequence was searched within 1,000bp from the transcription initiation site in silico using human and mouse genome database. It was further analyzed whether those genes were suggested to increase in neonatal cholangiocytes as compared with in hepatoblasts on the microarray data.

Fig. S1

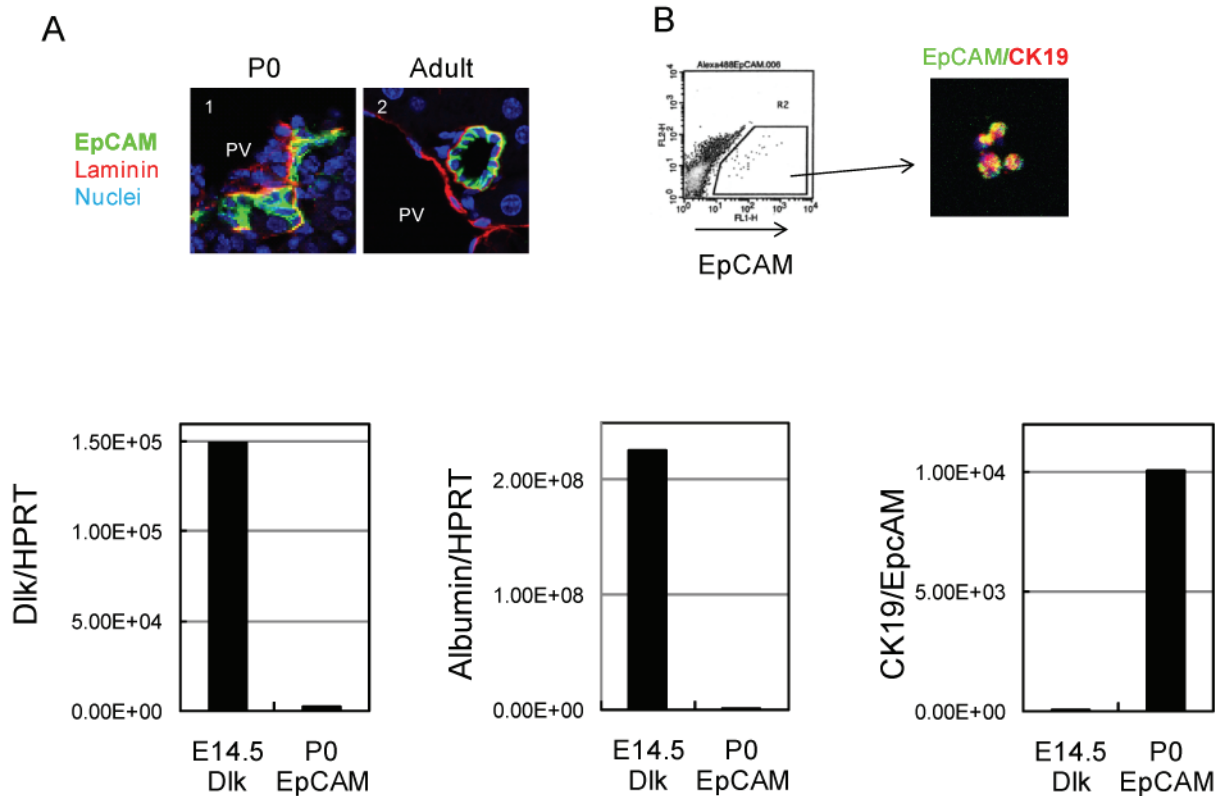

**Fig. S1. Isolation and characterization of neonatal cholangiocytes**

**A. Expression of EpCAM in neonatal and adult livers.** EpCAM is expressed in cholangiocytes forming either the ductal plate (panel 1) or bile duct tubules (panel 2).

**B. Isolation of EpCAM<sup>+</sup> cholangiocytes from neonatal liver.** Isolated EpCAM<sup>+</sup> cells (green) are positive for CK19 (red). P0 liver cells were stained with FITC-conjugated anti-EpCAM antibody. EpCAM<sup>+</sup> cells were isolated by FACS Aria and stained with anti-CK19 antibody.

**C. Expression of Dlk1 (a hepatoblast marker), albumin (a hepatoblast/hepatocyte marker), and CK19 (a cholangiocyte marker) in isolated hepatoblasts and cholangiocytes.** Expression of Dlk1 and albumin are barely detected in EpCAM<sup>+</sup> cholangiocytes, whereas CK19 is strongly expressed in those cells.

Fig. S2

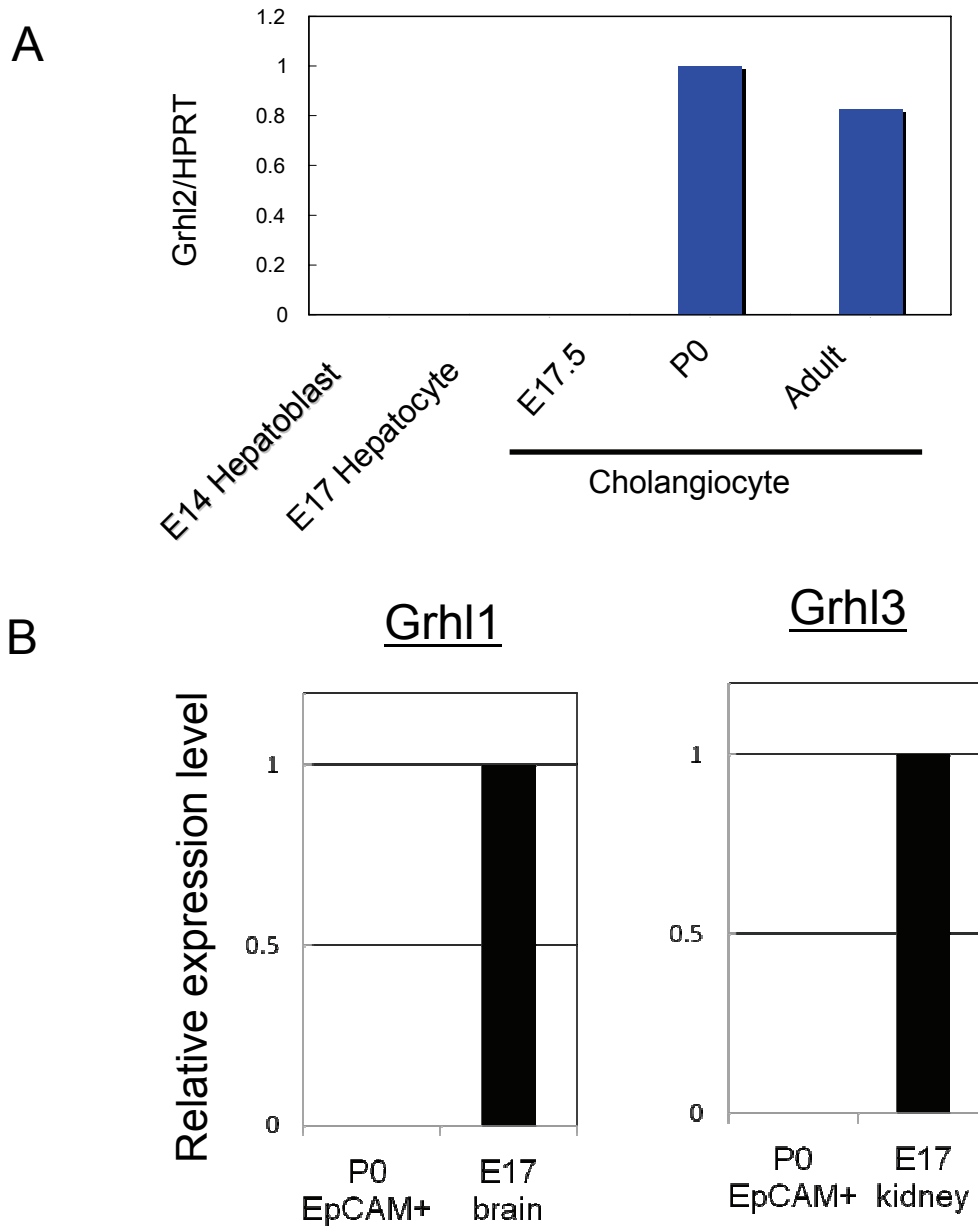

**Fig. S2. Grhl2 is expressed in cholangiocytes in the liver.**

**A. Expression of Grhl2 mRNA in hepatoblasts and cholangiocyte in developing liver.** Grhl2 is not expressed in hepatoblasts and E17.5 cholangiocytes, whereas it is detected in P0 and adult cholangiocytes.

**B. Expression of Grhl1 and 3.** In contrast to Grhl2, Grhl1 and 3 are not expressed in cholangiocytes.

Fig. S3

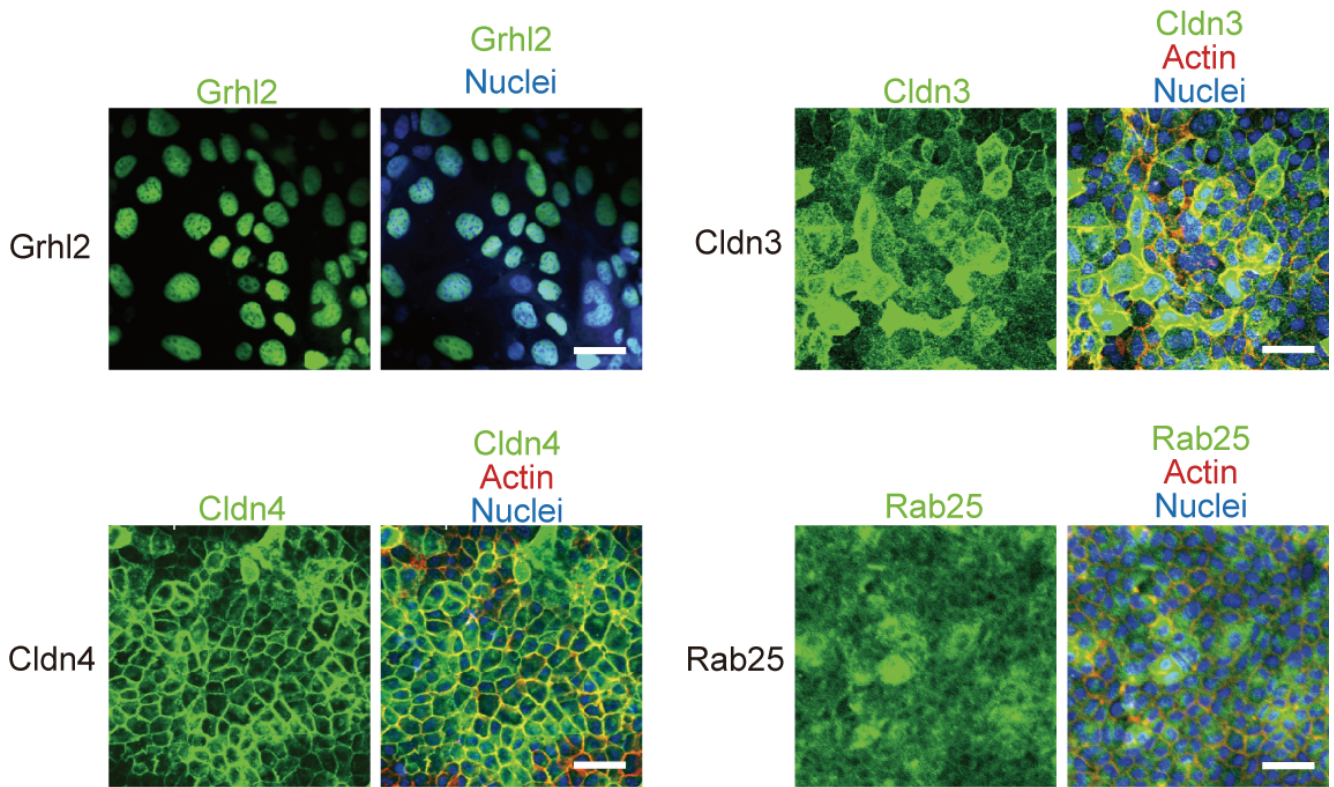

**Fig. S3. Expression of transgenes introduced by retrovirus vectors in 2D culture of HPPL.** HPPL were infected with retrovirus containing cDNA of Grhl2, Cldn3, Cldn4 or Rab25. Most of cells express each transgene. Scale bars represent 50  $\mu$ m.

Fig. S4

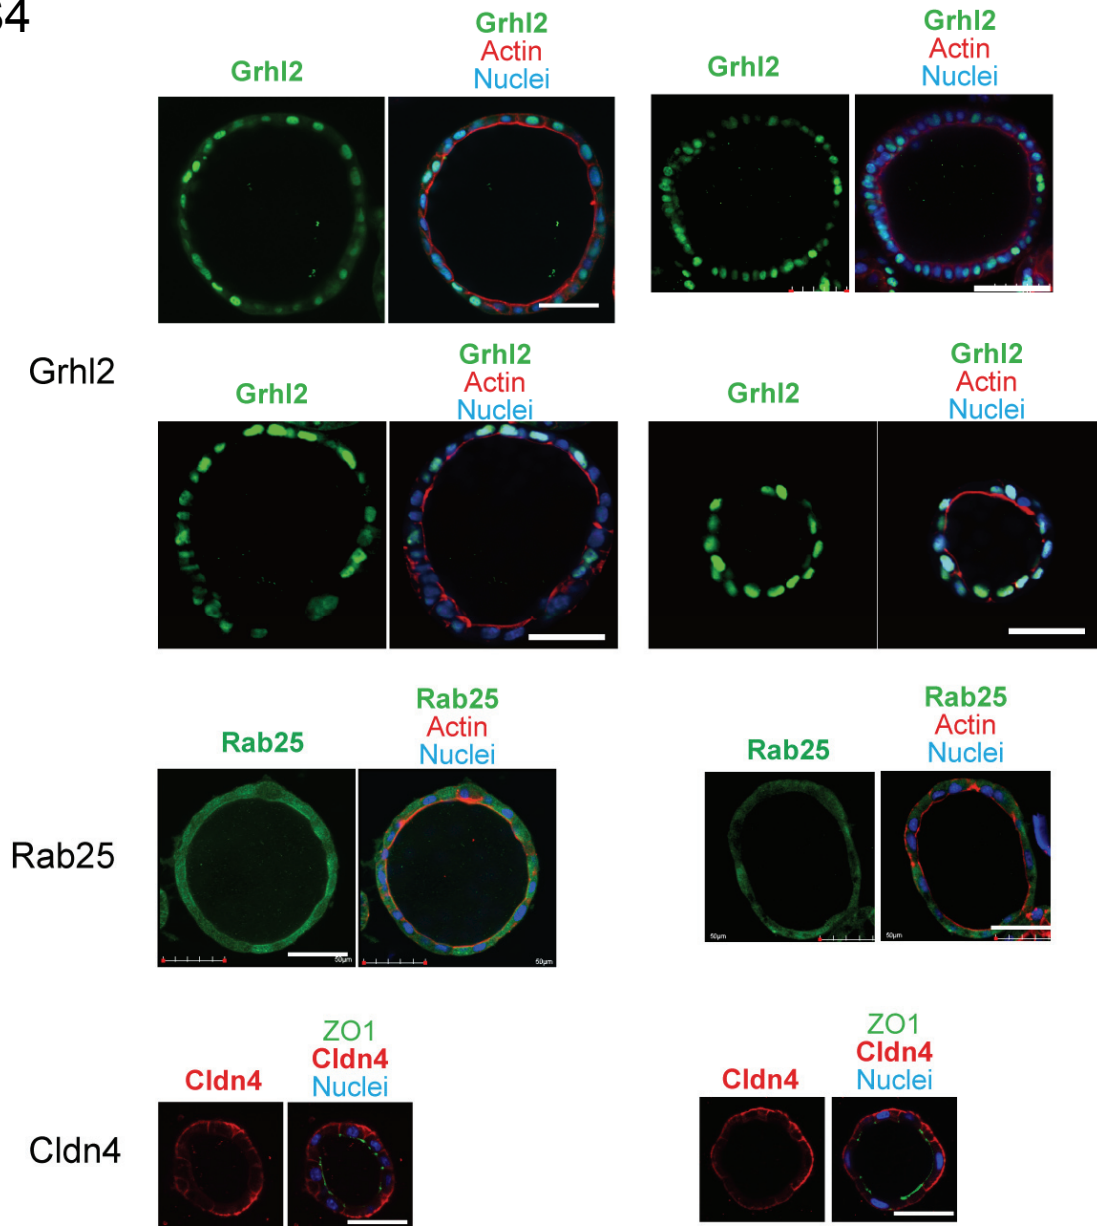

**Fig. S4. Expression of transgenes introduced by retrovirus vectors in 3D culture of HPPL.** HPPL were infected with retrovirus containing cDNA of Grhl2, Cldn4 or Rab25. Most of cells express each transgene. Scale bars represent 50 μm.



Fig. S5

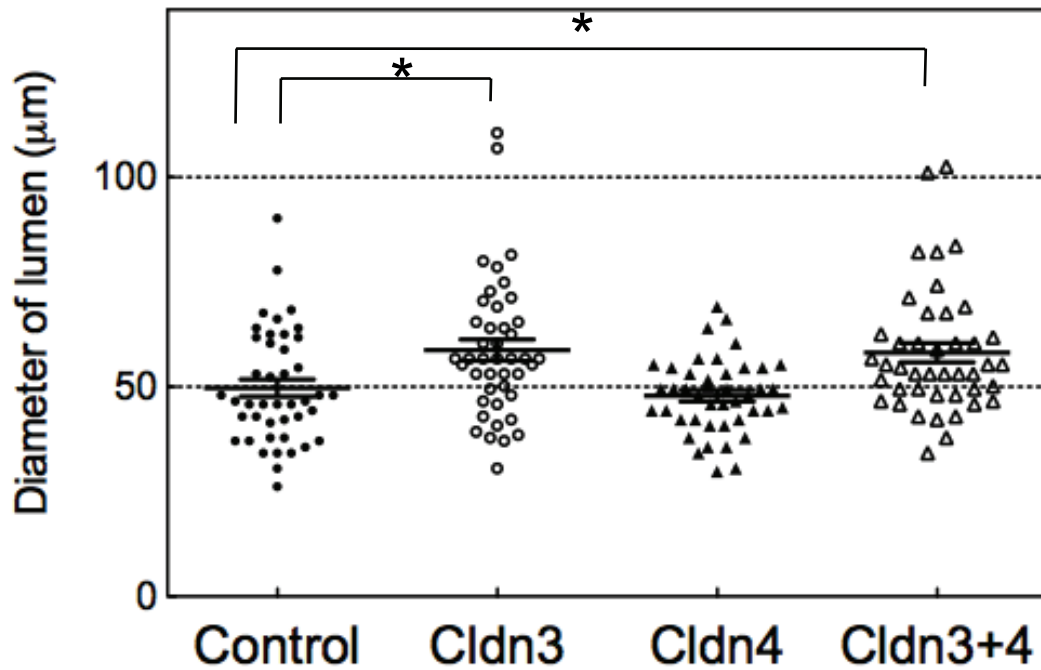

**Fig. S5 Cldn4 expression does not increase the diameter of lumen.** Expression of Cldn4 alone does not enlarge lumen. Furthermore, co-expression of Cldn3 and 4 does not further enhance the increase of lumen size induced by expression of Cldn3 alone. \* represents  $P < 0.05$ .

Fig. S6

A

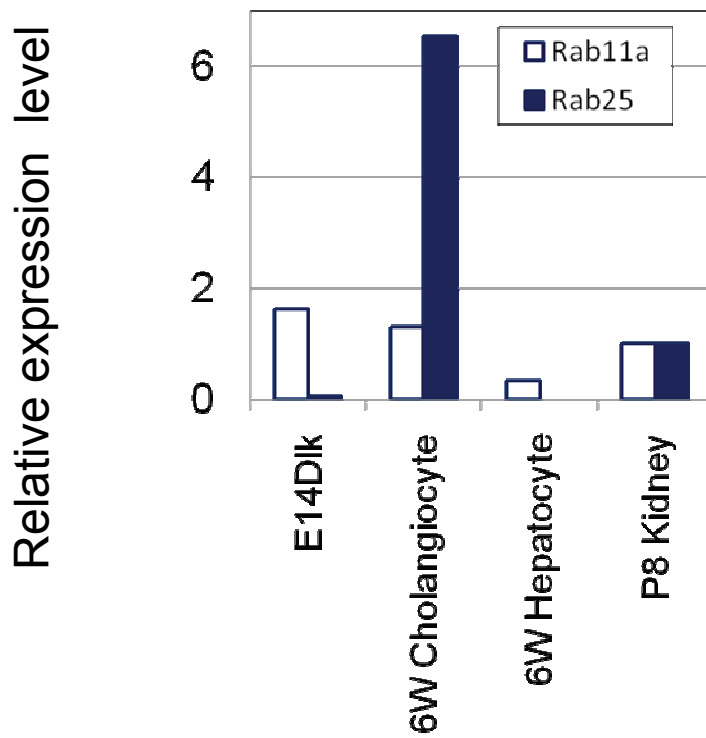

B

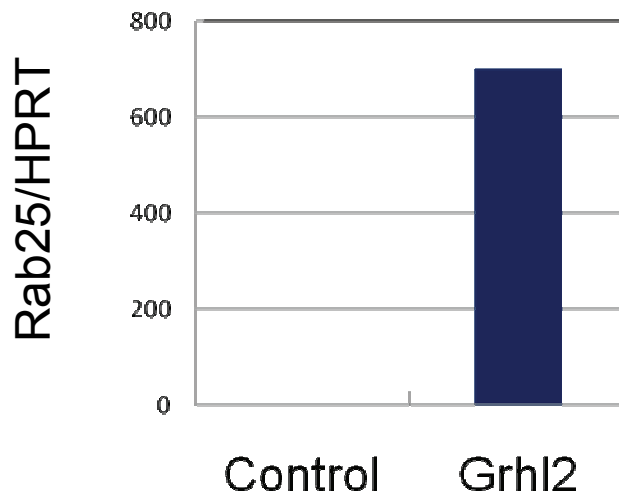

**Fig. S6. Expression of Rab25 in liver epithelial cells.** Rab25 is specifically expressed in cholangiocytes in the liver (A). Grhl2 remarkably increases expression of Rab25 in HPPL.

Fig. S7

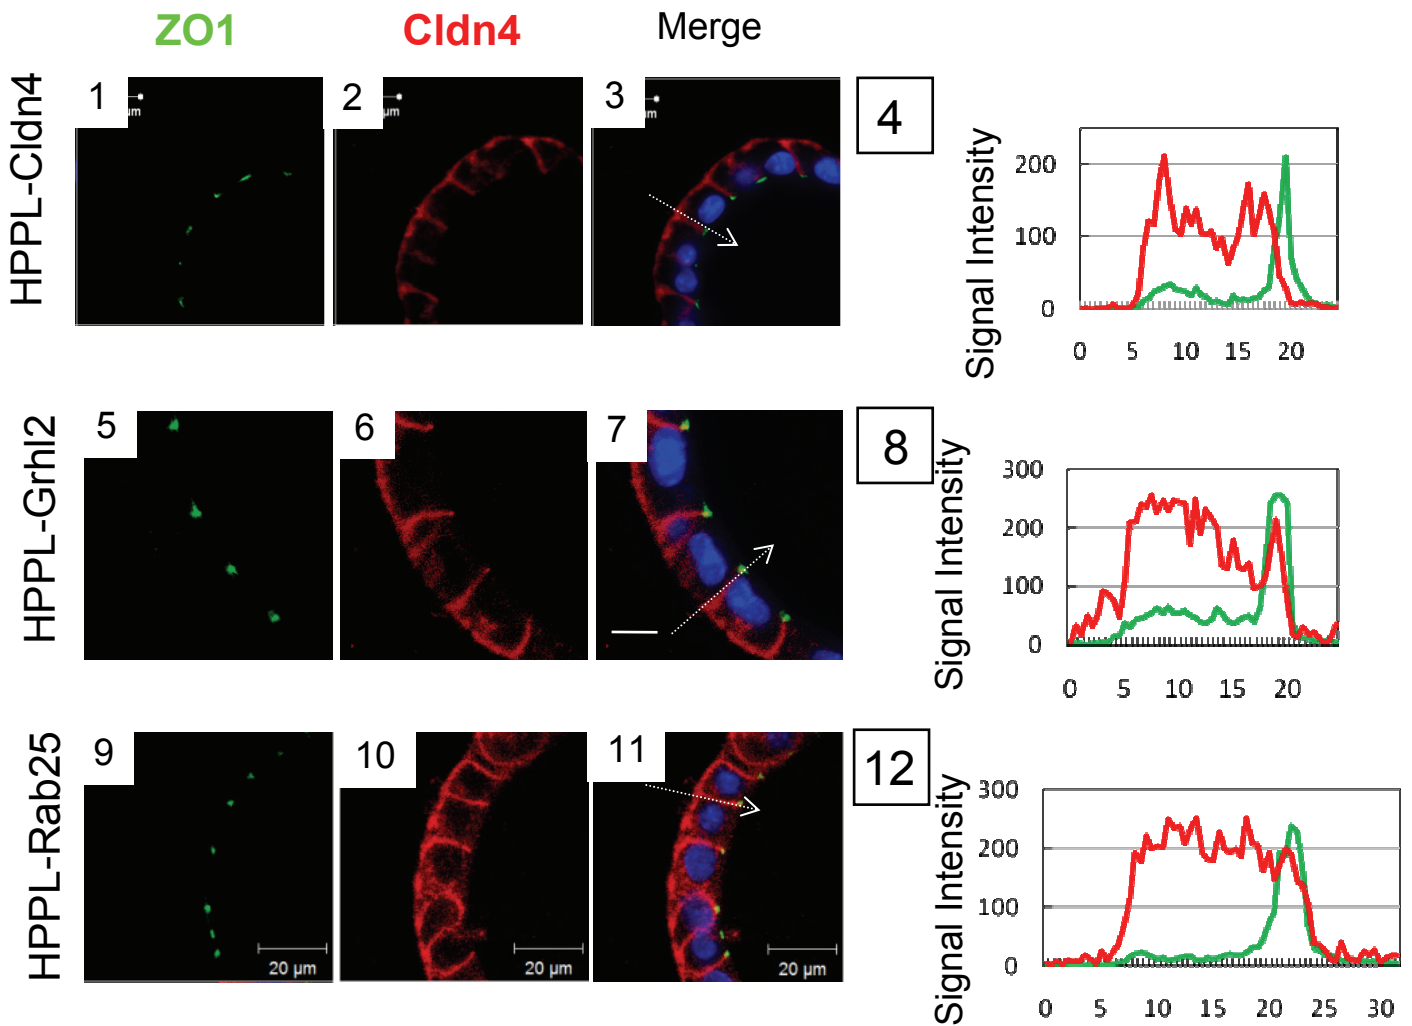

**Fig. S7. Analysis for colocalization of Cldn4 and ZO1.** Signal intensity along a lateral membrane is plotted in panel 4, 8, and 12. In HPPL-Cldn4, Cldn4 signal (red line) is visible from the basal tip to near the apical tip. However, it suddenly decreases at TJs, where ZO1 signal (green line) shows a peak. On the other hand, Cldn4 signal is still significantly observed at TJs in HPPL-Grhl2 and HPPL-Rab25. For quantitative analysis, the signal intensity at TJs over 30% of that at the basal was considered as localization of Cldn4 at TJs.

Fig. S8

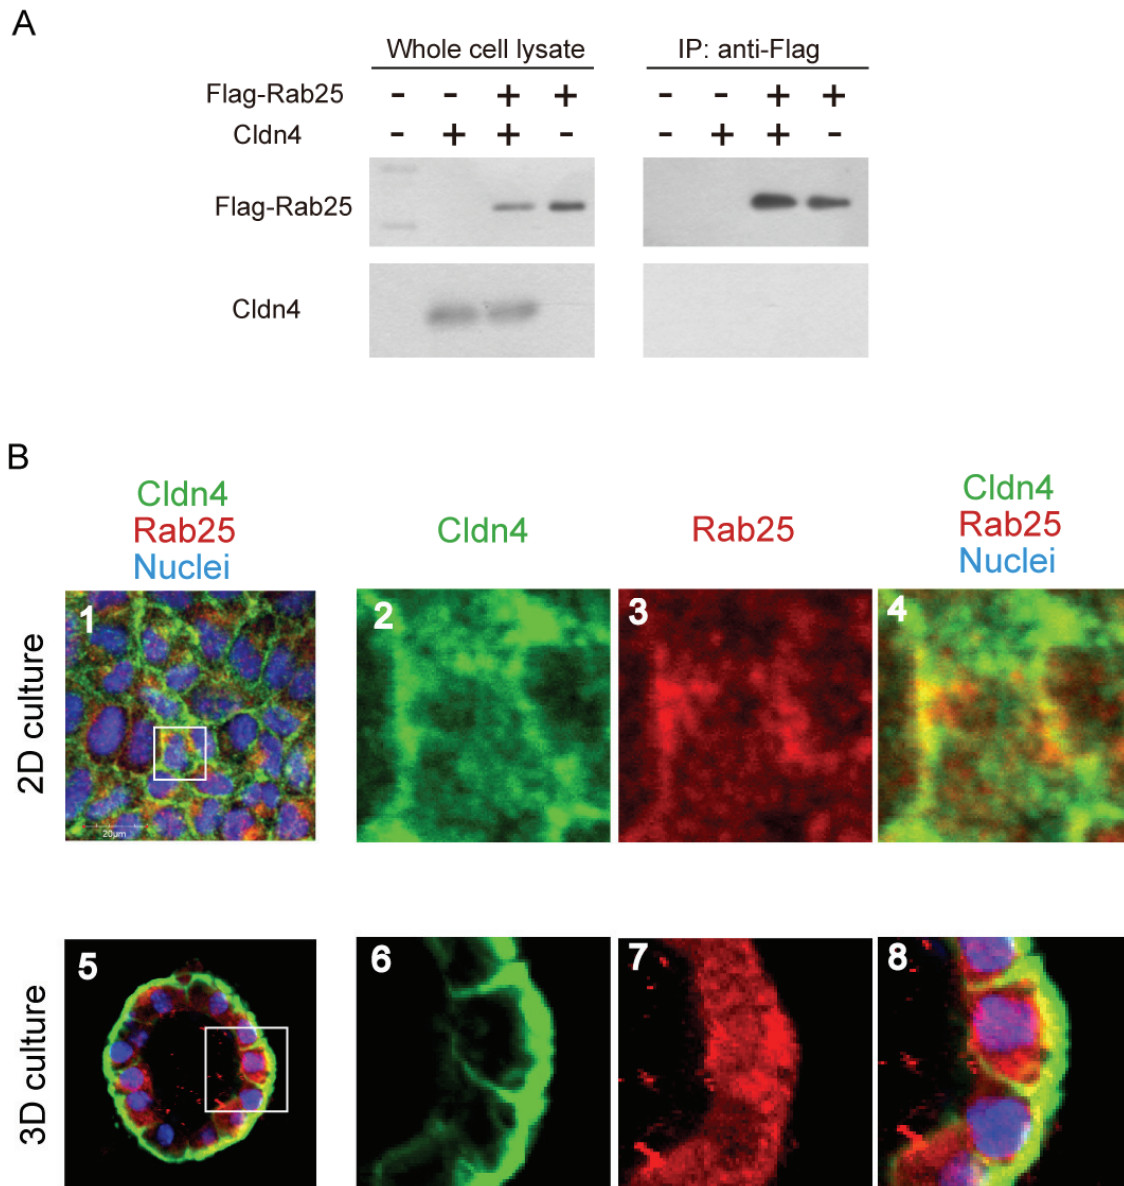

**Fig. S8. Interaction between Cldn4 and Rab25.**

A. No direct interaction between Cldn4 and Rab25. cDNAs of Cldn4 and Flag-tagged Rab25 were transfected to COS-7 cells. Immunoprecipitation was performed by using anti-Flag antibody and Protein G sepharose. Proteins bound to Protein G were detected with anti-Flag and anti-Cldn4 antibodies.

B. Rab25 are partly colocalized with Cldn4 and in HPPL. Cldn4 and myc-tagged Rab25 were detected with anti-Cldn4 (green) and anti-myc (red) antibodies, respectively. Yellow dots in panels 4 and 8 suggest the colocalization of Rab25 and Cldn4.
